# Supplementary material for: Understanding the mechanism of the competitive adsorption in 8-methylquinoline hydrogenation over a Ru catalyst
Source: Royal Society of Chemistry journal article supplement (doi:10.1039/d0ra01277g), 2020-01-01
Supplement: d0ra01277g1.pdf [file d0ra01277g1.pdf]

## Supporting Information

### Understanding the mechanism of the competitive adsorption in 8-methylquinoline hydrogenation over Ru catalyst

Yuan Dong<sup>a</sup>, Haoming Zhao<sup>a</sup>, Zhenjie Liu<sup>a</sup>, Ming Yang<sup>\*a,b</sup>, Zhenlin Zhang<sup>a</sup>, Ting Zhu<sup>a</sup> and  
Hansong Cheng<sup>\*a</sup>

<sup>a</sup> Sustainable Energy Laboratory, Faculty of Materials science and Chemistry, China University of Geosciences, Wuhan 430074, P. R. China

<sup>b</sup> Zhejiang Institute, China University of Geosciences, Hangzhou 311305, P. R. China

\*Corresponding authors. Tel./fax: +86 2767883049. E-mail address: yangming8180@gmail.com (M. Yang). chenghs@cug.edu.cn (H. Cheng).

The structure of the produced 4H-8-MQL from 8-MQL hydrogenation was determined by <sup>1</sup>H NMR, which was displayed in Figure S1. <sup>1</sup>H NMR (400 MHz, CDCl<sub>3</sub>, 298K): δ 6.86 (d, *J* = 7.3 Hz, 1H), 6.83 (d, *J* = 7.5 Hz, 1H), 6.54 (t, *J* = 7.4 Hz, 1H), 3.37 - 3.34 (m, 2H), 2.77 (t, *J* = 6.4 Hz, 2H), 2.06 (s, 3H), 1.95 - 1.90 (m, 2H).

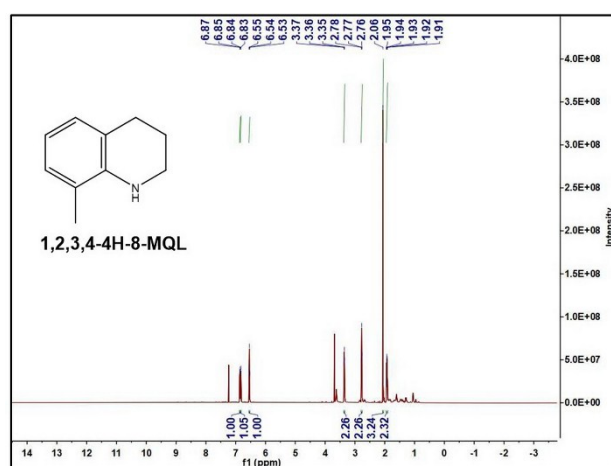

Figure S1. The structure of 4H-8-MQL detected by <sup>1</sup>H NMR.

The influences of temperature and pressure on hydrogenation rates of 8-MQL were investigated in detail. Figure S2 shows the mole fraction distributions for 8-MQL hydrogenation at 120 - 170 °C over Ru/Al<sub>2</sub>O<sub>3</sub>. The standard hydrogenation conditions designed in this experiment were: 0.2 g Ru/Al<sub>2</sub>O<sub>3</sub> catalyst, 4 g 8-MQL, 40 ml dioxane and 7 MPa hydrogen pressure. Figure S3 shows mole fraction distributions for 8MQL hydrogenation under 4-9 MPa. The standard hydrogenation conditions were: 0.2 g Ru/Al<sub>2</sub>O<sub>3</sub> catalyst, 4 g 8-MQL, 40 ml dioxane, 160 °C.

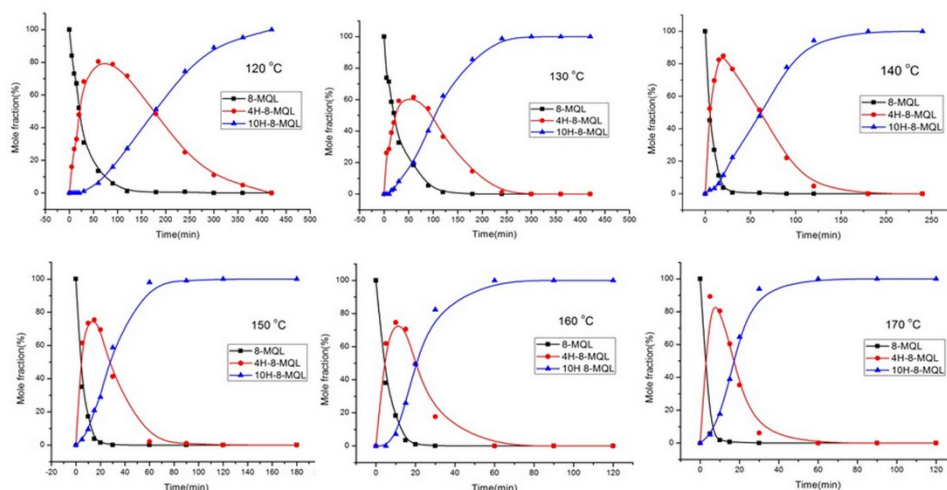

Figure S2. Mole fraction distributions for 8-MQL hydrogenation at 120 - 170 °C over Ru/Al<sub>2</sub>O<sub>3</sub>. General reaction conditions: 4 g 8-MQL, 0.4 g Ru/Al<sub>2</sub>O<sub>3</sub>, 40 ml dioxane as solvents, 7 MPa H<sub>2</sub>.

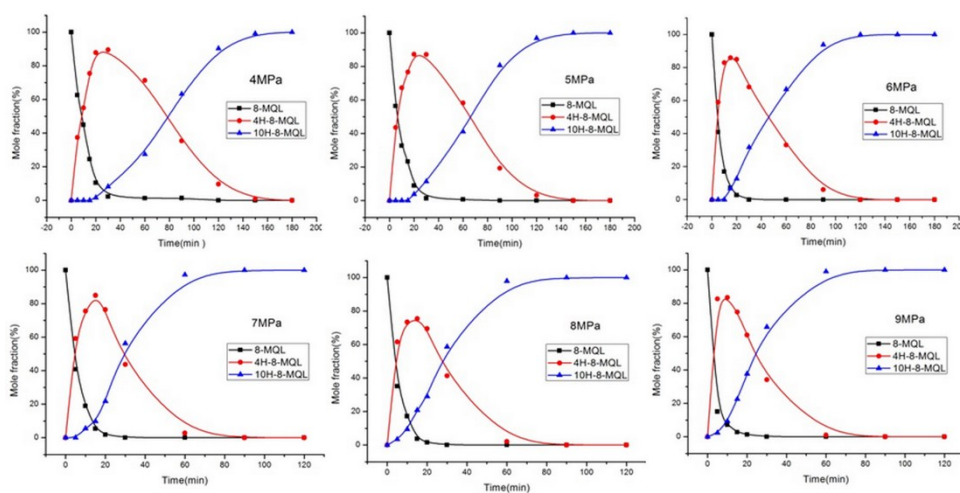

Figure S3. Mole fraction distributions for 8-MQL hydrogenation under 4 - 9 MPa over Ru/Al<sub>2</sub>O<sub>3</sub>. General reaction conditions: 4 g 8-MQL, 0.4 g Ru/Al<sub>2</sub>O<sub>3</sub>, 40 ml dioxane as solvents, 160 °C.
